# Supplementary material for: Baseline immunophenotypic profile of bone marrow leukemia cells in acute myeloid leukemia with nucleophosmin-1 gene mutation: a EuroFlow study
Source: PubMed Central journal article supplement (PMC10477264; doi:10.1038/s41408-023-00909-4), 2023-09-04
Supplement: 41408_2023_909_MOESM1_ESM.pdf [file 41408_2023_909_MOESM1_ESM.pdf]

1 **Supplementary Data.**

2

3 **Baseline immunophenotypic profile of bone marrow leukemia cells in acute myeloid**  
4 **leukemia with nucleophosmin-1 gene mutation: a Euroflow study.**

5 Sergio Matarraz<sup>1,2\*</sup>, Pilar Leoz<sup>2,3</sup>, Ana Yeguas-Bermejo<sup>2,3</sup>, Vincent van der Velden<sup>4</sup>, Anne E.  
6 Bras<sup>4</sup>, Jose I. Sánchez Gallego JI<sup>1,2</sup>, Quentin Lecrevisse<sup>1,2</sup>, Rosa Ayala-Bueno<sup>1,2</sup>, Cristina  
7 Teodosio<sup>1,2</sup>, Ignacio Criado<sup>1,2</sup>, María González-González<sup>1,2</sup>, Juan Flores-Montero<sup>2,3</sup>, Alejandro  
8 Avendaño<sup>2,3</sup>, María B. Vidriales<sup>2,3</sup>, María C. Chillón<sup>2,3</sup>, Teresa González<sup>2,3</sup>, Ramón García-  
9 Sanz<sup>2,3</sup>, María I. Prieto Conde<sup>2,3</sup>, Neus Villamor<sup>5</sup>, Laura Magnano<sup>5</sup>, Enrique Colado<sup>6</sup>, Paula  
10 Fernández<sup>7</sup>, Edwin Sonneveld<sup>8</sup>, Jan Philippé<sup>9</sup>, Michaela Reiterová<sup>10</sup>, Juan C. Caballero  
11 Berrocal<sup>11</sup>, Francisco J. Díaz-Gálvez<sup>12</sup>, Fernando Ramos<sup>13</sup>, Julio Dávila Valls<sup>14</sup>, Raquel Manjón  
12 Sánchez<sup>15</sup>, Jackeline Solano Tovar<sup>16</sup>, Xavier Calvo<sup>17</sup>, Luis García Alonso<sup>18</sup>, Leonor Arenillas<sup>17</sup>,  
13 Sara Alonso<sup>6</sup>, Ariana Fonseca<sup>6</sup>, Covadonga Quirós Caso<sup>6</sup>, Jacques J.M. van Dongen<sup>1,2,19</sup>, Alberto  
14 Orfao<sup>1,2\*</sup>.

15

16 **Running title.** Immunophenotypic profile of NPM1 mutated AML

17

18 **Author Affiliations:**

19 <sup>1</sup>Translational and Clinical Research Program, Centro de Investigación del Cáncer (IBMCC;  
20 CSIC-University of Salamanca); Cytometry Service, NUCLEUS; Department of Medicine,  
21 University of Salamanca (USAL) and Institute of Biomedical Research of Salamanca (IBSAL).

22 <sup>2</sup> Biomedical Research Networking Centre Consortium of Oncology (CIBERONC), Instituto de  
23 Salud Carlos III, 28029 Madrid, Spain.

24 <sup>3</sup>Hematology Department, University Hospital of Salamanca, CIBERONC (CB16/12/00233),  
25 IBSAL, Accelerator program and Centro de Investigación del Cáncer (IBMCC; CSIC-University of  
26 Salamanca).

27 <sup>4</sup>Department of Immunology, Erasmus MC, University Medical Center Rotterdam, Rotterdam, The  
28 Netherlands.

29 <sup>5</sup>Hematology Service, Hospital Clinic, Barcelona, Spain.

30 <sup>6</sup>Hematology Department and Laboratory Medicine Department, Hospital Universitario Central de  
31 Asturias, Oviedo, Spain.

32 <sup>7</sup>FACS/Stem Cell Laboratory, Kantonsspital Aarau, Aarau, Switzerland.

33 <sup>8</sup>Dutch Childhood Oncology Group, The Hague, The Netherlands.

34 <sup>9</sup>Department of Diagnostic Sciences, Faculty of Medicine and Health Sciences, Ghent University,  
35 Ghent, Belgium.

36 <sup>10</sup>CLIP-Department of Pediatric Hematology and Oncology, Second Medical Faculty, Charles  
37 University and University Hospital Motol, Prague, Czech Republic.

38 <sup>11</sup>Department of Hematology, Hospital Clínico Universitario de Valladolid, Valladolid, Spain;

39 <sup>12</sup>Department of Hematology, Hospital Universitario de Burgos, Burgos, Spain.

40 <sup>13</sup>Department of Hematology, Complejo Asistencial Universitario de León, León, Spain.  
41 <sup>14</sup>Department of Hematology, Complejo Asistencial de Ávila, Ávila, Spain.  
42 <sup>15</sup>Department of Hematology, Complejo Asistencial de Zamora, Zamora, Spain.  
43 <sup>16</sup>Department of Hematology, Complejo Asistencial Universitario de Palencia, Palencia, Spain.  
44 <sup>17</sup>Pathology Service, Hospital del Mar, Barcelona, Spain.  
45 <sup>18</sup>Hematology Service, University Hospital of Getafe, Madrid, Spain;  
46 <sup>19</sup>Department of Immunology, Leiden University Medical Center, Leiden, The Netherlands.

47

#### 48 **Supplementary Methods.**

49

50 **Patients and samples.** A total of 377 BM samples from newly-diagnosed, previously untreated  
51 (unless stated otherwise), adult (n=366, 55% males and 45% females; median age of 62 years,  
52 range: 19-90 years) and pediatric AML patients (n=11, 36% males and 64% females; median age  
53 12 years, range: 1-15 years) diagnosed according to the World Health Organization (WHO) 2016  
54 criteria, were retrospectively studied.<sup>1</sup> These included 201 AML cases with *NPM1*<sup>mut</sup> together with  
55 144 AML-*NPM1*<sup>wt</sup> and 32 patients with APL. *FLT3*-ITD was systematically investigated and it was  
56 detected in 66/201 AML-*NPM1*<sup>mut</sup> cases (33%), 27/144 (19%) AML-*NPM1*<sup>wt</sup> and in 11/32 APL  
57 (34%) patients.

58 According to the WHO classification,<sup>1</sup> AML-*NPM1*<sup>wt</sup> (non-APL) patients were distributed as  
59 follows: i) 42 had AML with recurrent genetic abnormalities -4 AML with t(8;21)(q22;q22.1) cases,  
60 7 AML with inv(16)(p13.1q22) or t(16;16)(p13.1;q22), 6 AML with t(9;11)(p21.3;q34.1), 1 AML with  
61 t(11;19)(q23.3;p13.3), 1 AML with t(6;9)(p23;q34.1), 4 AML with inv(3)(q21.3q26.2) or  
62 t(3;3)(q21.3;q26.2), 4 AML with biallelic *CEBPA* gene mutation, and 15 AML with mutated  
63 *RUNX1*-; ii) 42 AML with myelodysplasia-related changes; iii) 9 therapy-related myeloid  
64 neoplasms; iv) 51 AML-NOS (not otherwise specified) (6 AML with minimal differentiation, 17  
65 AML without maturation, 13 AML with maturation, 2 acute myelomonocytic leukemias; 12 acute  
66 monoblastic and monocytic leukemias and 1 pure erythroid leukemia). All patients gave their  
67 informed consent to participate in the study according to the Declaration of Helsinki, and the study  
68 was approved by the Ethics committees of the 16 participant centers (Salamanca, Barcelona,  
69 Asturias, Valladolid, Burgos, León, Ávila, Zamora, Palencia and Getafe, Spain; Rotterdam, The  
70 Hague and Leiden, The Netherlands; Aarau, Switzerland; Ghent, Belgium and; Prague, Czech  
71 Republic).

72 **Immunophenotypic studies.** Flow cytometry immunophenotyping was performed at diagnosis  
73 at the center of origin on freshly-obtained (<36 h) EDTA or heparin anticoagulated BM samples,  
74 using EuroFlow standard operating procedures.<sup>2,3</sup> Thus, BM samples were stained with the 8-  
75 color EuroFlow acute leukemia orientation tube (ALOT) and the EuroFlow AML/MDS antibody  
76 panel (Supplementary Table 1), as described in detail at [www.euroflow.org](http://www.euroflow.org).<sup>4</sup> Stained cells were  
77 measured locally in FACSCanto II flow cytometers (Becton/Dickinson Biosciences, BD; San Jose,  
78 CA) equipped with the FACSDiva 6.1 software (BD). Subsequently, flow cytometry data files were  
79 analysed both locally and centrally at the Cytometry Service of the University of Salamanca  
80 (Salamanca, Spain) using Infinicyt (software version 2.0.5; Cytognos SL, Salamanca, Spain). For  
81 inclusion in the study, each patient data file underwent stringent quality assessment criteria, as  
82 previously described.<sup>5</sup> In each case, leukemia cells were identified using their unique  
83 immunophenotypic profile for the four backbone markers (CD34, HLA-DR, CD117 and CD45) and  
84 light scatter characteristics on bivariate dot plots. Analysis of leukemia cells in the ALOT tube,  
85 was performed as previously reported.<sup>6</sup> Presence of an abnormal expansion of a BM cell  
86 compartment was established when its mean frequency was >2 SD from its frequency in BM from  
87 healthy subjects.<sup>7</sup>

88

89 **Interphase fluorescence in situ hybridization studies.** Interphase fluorescence in situ  
90 hybridization aimed at detection of chromosomal rearrangements and translocations, was  
91 performed on interphase nuclei from whole BM cells after they had been fixed in 3/1 (v/v)  
92 methanol/acetic, according to previously reported techniques.<sup>8</sup> For this purpose, the following  
93 chromosomal probes purchased from Vysis (Downers Grove, IL) and Kreatech, (Amsterdam, The  
94 Netherlands) were used in double stainings (spectrum orange and spectrum green): i) LSI  
95 RUNX1/RUNX1T1 Dual Color (DC) Dual Fusion (DF) (Vysis) for t(8;21)(q22;q22.1); ii) LSI CBFB  
96 DC Break Apart (BA) (Vysis) for inv(16)(p13.1q22) or t(16;16)(p13.1;q22); iii) LSI PML/RARA DC,  
97 DF (Vysis) for t(15;17)(q24;q21.1) and LSI RARA DC BA (Vysis) for rearrangements of the RARA  
98 gene; iv) LSI MLL DC BA (Vysis) for t(9;11)(p21.3;q34.1) and t(11;19)(q23.3;p13.3); v)  
99 DEK/NUP214 t(6;9) DC DF (Kreatech) for t(6;9)(p23;q34.1); vi) EVI t(3;3); inv(3) (3q26) DC BA  
100 (Kreatech) for inv(3)(q21.3q26.2) or t(3;3)(q21.3;q26.2).

101 **Genetic and molecular studies.** Interphase fluorescence in situ hybridization aimed at detection  
102 of chromosomal rearrangements and translocations was performed according to previously  
103 reported techniques.<sup>8</sup> In parallel, presence of *RUNX1::RUNX1T1*, *CBFB::MYH11* and  
104 *PML::RARA* fusion transcripts was assessed by real-time quantitative polymerase chain reaction  
105 (RQ-PCR) according to the recommendations of the Europe Against Cancer Program.<sup>9</sup> Mutations  
106 involving *FLT3-ITD*, *NPM1* and *CEBPA* were determined by fragment analysis and/or Sanger  
107 sequencing, following previously reported probes and protocols.<sup>10–12</sup> In addition to the above  
108 genetic analyses, next generation sequencing (NGS) based on a custom captured-based gene  
109 panel (PanMyeloid Panel, SOPHiA GENETICS, Switzerland) was performed.<sup>13</sup> Sequences  
110 obtained were analysed with the SOPHIA GENETICS DDM v3.0 software (Lausanne,  
111 Switzerland).

112

113 **Statistical methods.** Median (range) and mean (SD) values, as well as the 10<sup>th</sup>, 25<sup>th</sup>, 75<sup>th</sup> and  
114 90<sup>th</sup> percentiles, were calculated for continuous variables; for categorical variables, frequencies  
115 were reported. For all immunophenotypic markers investigated, a cut-off for positivity of ≥20%  
116 expression on specific cell populations was used. To determine the statistical significance of  
117 differences observed among ≥2 groups, the Mann–Whitney U and the Kruskal–Wallis tests (for  
118 continuous variables) or the X<sup>2</sup>-test (for categorical variables), were used. Receiver operating  
119 curves were employed to establish cut-off values to predict for *NPM1* mutation. Odds ratios (OR)  
120 and their 95% confidence intervals (CI) were calculated for the informative immunophenotypic  
121 parameters using univariate and multivariate logistic regression models. *P*-values <0.05 (with a  
122 false discovery rate correction for multiple comparisons of <5%) were considered statistically  
123 significant. For statistical analyses, the SPSS 26.0 software (SPSS, IBM, Chicago, IL) was used.  
124 The GraphPad Prism 8 (version 8.0.2; GraphPad Software Inc., Boston, MA) was used for box-  
125 plot figures.

126 **Supplementary Results.**

127

128 **Immunophenotype of AML-*NPM1*<sup>mut</sup> leukemia cell subsets in BM.** Among *NPM1*<sup>mut</sup> patients,  
129 immature AML cells showed higher expression of CD34 (median of 7% vs. 0% AML cells), CD117  
130 (100% vs. 87%), HLA-DR (90% vs. 0%), CD71 (77% vs. 44%), CD13 (96% vs. 62%), CD123  
131 (96% vs. 83%), CD38 (95% vs. 84%) and CD15 (23% vs. 9%) compared to AML-*NPM1*<sup>mut</sup>  
132 neutrophil lineage-committed leukemia cells ( $p < 0.001$ ), together with lower levels of CD105 (2%  
133 vs. 10%,  $p < 0.001$ ), CyMPO (60% vs. 88%,  $p < 0.001$ ) and CD64 (7% vs. 13%;  $p = 0.03$ ) (Figure 2).  
134 In addition, compared to *NPM1*<sup>mut</sup> neutrophil lineage-committed leukemia cells, AML-*NPM1*<sup>mut</sup>  
135 immature cells more frequently showed CD4 (16% vs. 6%,  $p < 0.001$ ) and aberrant CD7 (38% vs.  
136 0%,  $p < 0.001$ ), CD25 (6% vs. 0.03%,  $p < 0.001$ ) and CD9 expression (23% vs. 8% AML cells;  
137  $p = 0.02$ ) in the absence of CD56 expression (1% vs. 24% AML cases, respectively;  $p < 0.001$ )  
138 (Supplementary Figure 2, Supplementary Table 3).

139 In contrast to immature and neutrophil lineage-committed AML-*NPM1*<sup>mut</sup> cells, AML-*NPM1*<sup>mut</sup>  
140 monocytic leukemia cells systematically expressed (>90% cells) CD64<sup>hi</sup>, HLA-DR<sup>+</sup>, CD33<sup>hi</sup>,  
141 CD38<sup>+</sup>, CD36<sup>+</sup>, CD15<sup>+</sup> and CD123<sup>lo</sup>, together with CD11b<sup>+</sup> (81%), CD4<sup>lo</sup> (80%), CD35<sup>+</sup> (48%),  
142 CD300e<sup>+</sup> (45%) and CD14 (31%) in a significant fraction of these cells (Supplementary Figure 2).  
143 In turn, they showed lower expression of CD34 (median of 0% vs. 7% and 0% AML cells), CD117  
144 (5% vs. 100% and 87%), CD71 (34% vs. 77% and 44%), CD13 (37% vs. 96% and 62%), CyMPO  
145 (34% vs. 60% and 88%), associated with a higher frequency of CD105<sup>+</sup> (39% vs. 2% and 10%;  
146  $p < 0.001$ ) and CD9<sup>+</sup> leukemia cells (37% vs. 23% and 8%, respectively;  $p < 0.001$ ) (Supplementary  
147 Figure 2). In addition, aberrant CD56 expression was more frequently detected among AML-  
148 *NPM1*<sup>mut</sup> patients with monocytic-lineage leukemia cells vs. those with immature and neutrophil  
149 lineage-committed AML cells (46% vs. 1% and 24% of AML cases, respectively;  $p < 0.001$ ), while  
150 expression of CD7, CD22, NG2, CD25 and NuTdT on monocytic leukemia cells was infrequent  
151 ( $\leq 2\%$  of AML cases) (Supplementary Figure 2 and Supplementary Table 3).

152

153 **Phenotypic profiles of AML-*NPM1*<sup>mut</sup> *FLT3*-ITD<sup>+</sup> vs. *FLT3*-ITD<sup>-</sup> cells.** Coexistence of *NPM1*<sup>mut</sup>  
154 and *FLT3*-ITD<sup>+</sup> in AML was associated with an enhanced BM leukemia cell infiltration vs. AML  
155 *NPM1*<sup>mut</sup>*FLT3*-ITD<sup>-</sup> cases (87% vs. 68% AML cells;  $p < 0.001$ ), and a greater expansion of

156 immature AML cells (61% vs. 39% cases, respectively;  $p=0.008$ ) (Supplementary Figure 1-I),  
157 which accounted for a median percentage of 36% vs. 25% of all leukemia cells, respectively  
158 ( $p=0.05$ ) (Supplementary Table 2). Such expansion of immature AML cells more frequently  
159 occurred in patients who also showed monocytic AML cells (35% vs. 17% cases;  $p<0.001$ ), while  
160 decreased the frequency of AML  $NPM1^{mut}FLT3-ITD^+$  cases who had a predominant monocytic  
161 leukemia cell expansion (10% vs. 23%;  $p=0.04$ ) and mixed expansions of neutrophil and  
162 monocytic AML cells (1% vs. 10% cases, respectively;  $p=0.03$ ) (Supplementary Figure 1-I).

163 The coexistence of  $NPM1^{mut}$  and  $FLT3-ITD^+$  on immature BM leukemia cells was associated  
164 with unique immunophenotypes including: upregulation (vs.  $NPM1^{mut}FLT3-ITD^-$  cells) of stem cell-  
165 associated and aberrant markers, like CD34 (10% vs. 3% positive cells,  $p=0.04$ ), CD123 (98%  
166 vs. 94%,  $p=0.01$ ), CD7 (64% vs. 18%,  $p<0.001$ ), CD25 (28% vs. 0%,  $p=0.01$ ) and CD22 (18% vs.  
167 4% positive cases,  $p=0.02$ ), together with lower CD38 levels (90% vs. 97% positive cells,  
168 respectively  $p=0.001$ ) (Supplementary Figure 3). Similarly,  $NPM1^{mut}FLT3-ITD^+$  neutrophil lineage-  
169 committed AML cells also showed more immature and aberrant phenotypes vs. their  
170  $NPM1^{mut}FLT3-ITD^-$  counterpart, including: upregulation of CD123 (94% vs. 76%,  $p=0.001$ ),  
171 CD105 (18% vs. 4%,  $p=0.002$ ), CD13 (85% vs. 43%,  $p=0.002$ ), and an increased frequency of  
172 patients expressing CD56 (35% vs. 20%,  $p=0.02$ ), CD22 (8% vs. 2%,  $p=0.03$ ) and CD25 (4% vs.  
173 0%, respectively;  $p=0.05$ ) (Supplementary Figure 3). However, these  $NPM1^{mut}FLT3-ITD^+$  cells  
174 depicted (vs.  $FLT3-ITD^-$  cases) asynchronous CD117 downregulation (65% vs. 92% positive AML  
175 cells,  $p=0.002$ ) and a slightly higher CD11b reactivity (8% vs. 3%, respectively;  $p=0.02$ ). However,  
176 no significant phenotypic differences were observed among monocytic cells from  $NPM1^{mut}FLT3-$   
177  $ITD^+$  vs.  $NPM1^{mut}FLT3-ITD^-$  AML cases (Supplementary Table 4 and Supplementary Figure 3).

178

179 **Phenotypic profiles of AML- $NPM1^{wt}$  and APL patients with  $FLT3-ITD^+$ .** Interestingly, also  
180 among  $NPM1^{wt}$  AML cases, the presence of  $FLT3-ITD^+$  was associated with a higher percentage  
181 of BM infiltration by leukemia cells (74% vs. 51% among  $NPM1^{wt}FLT3-ITD^-$  AML cases,  $p=0.008$ )  
182 (Supplementary Table 2). Of note, this overall AML cell increase also affected their relative  
183 distribution and phenotypic profiles, as reflected by a higher frequency of  $NPM1^{wt}FLT3-ITD^+$  cases  
184 with mixed expansions of immature plus neutrophil lineage-committed AML cells (19% vs. 8%  
185  $NPM1^{wt}FLT3-ITD^-$  cases;  $p=0.001$ ), and of AML  $NPM1^{wt}FLT3-ITD^+$  cases with a predominant

186 monocytic population (22% vs. 8% *NPM1*<sup>wt</sup>*FLT3*-ITD<sup>-</sup> cases; p=0.001) (Supplementary Figure 1).  
187 Compared to *NPM1*<sup>wt</sup>*FLT3*-ITD<sup>-</sup> AML, *NPM1*<sup>wt</sup>*FLT3*-ITD<sup>+</sup> cases also showed lower CD34  
188 expression on immature leukemia cells (49% vs. 97% cells, p=0.01), downregulation of CD71  
189 both on neutrophil (39% vs. 76%, p=0.05) and monocytic lineage-committed leukemia cells (16%  
190 vs. 47%, p=0.05), and increased positivity for CD25 on both immature (30% vs. 7%, p=0.009) and  
191 monocytic AML cells (8% vs. 0%, p=0.005) (Supplementary Figure 2).

192 Similarly, APL cases presenting with *FLT3*-ITD<sup>+</sup> showed a significantly higher percentage of  
193 cases with a predominant immature leukemia cell compartment (18% vs. 0% APL *FLT3*-ITD<sup>-</sup>  
194 cases; p=0.04), associated with a higher median percentage of immature leukemia cells (3% vs.  
195 0.3% cells; p=0.03) vs. *FLT3*-ITD<sup>-</sup> cases; despite this, these two groups of APL patients showed  
196 an overall similar level of BM infiltration by leukemia cells (80% vs. 76% APL *FLT3*-ITD<sup>-</sup> cases,  
197 respectively; p>0.05) (Supplementary Table 2 and Supplementary Figure 1).

198

199 **Univariate analysis of *NPM1* mutation-associated immunophenotypes in AML.** Univariate  
200 logistic regression analysis revealed that AML-*NPM1*<sup>mut</sup> was associated with the presence of a  
201 lower percentage (<26.5%) of immature leukemia cells -odds ratio (OR): 2.0, p<0.001- showing  
202 also lower expression of CD34 (<35% positive cells; OR, 4.8; p<0.001), CD105 (<9.5%; OR, 0.4;  
203 p=0.001) and HLA-DR (<97%; OR, 0.3; p=0.001), together with expression of CD15 (>6.6%; OR,  
204 0.3; p<0.001), CD33 (>96%; OR, 1.4; p=0.04), and aberrant positivity for CD7 (OR, 1.5; p=0.02)  
205 in the absence of NuTdT (OR, 0.2, p<0.001) and CD56 expression (OR, 0.3, p=0.002) (Table 1).  
206 In addition, AML-*NPM1*<sup>mut</sup> was further characterized by higher numbers of neutrophil lineage-  
207 committed leukemia cells (>21.5%; OR, 1.6; p=0.008) displaying low levels of CD34 (<5% positive  
208 cells; OR, 4.0; p<0.001), CD71 (<70%; OR, 2.5; p<0.001), CD64 (<30%; OR, 4.3; p<0.001) and  
209 CD13 (<92%; OR, 3.2, p<0.001) and positivity for both CD105 (>3%; OR, 5.1; p<0.001) and CD56  
210 (>5%; OR, 5.6; p<0.001). Regarding monocytic-lineage AML cells, the highest predictive value  
211 for *NPM1*<sup>mut</sup> in AML was associated with the presence of any asynchronous pattern in monocytic  
212 AML cells (OR, 6.5; p<0.001), including the CD300e<sup>+</sup> CD14<sup>-</sup> (OR, 85.0; p<0.001) and CD35<sup>+</sup>  
213 CD14<sup>-</sup> (OR, 11.4; p<0.001) expression profiles, low CD34 (OR, 3.8; p<0.001), simultaneous  
214 presence of any asynchronous monocytic pattern and low CD34 (OR, 34.3; p<0.001), decreased  
215 CD13 (<77% positive AML cells; OR, 4.3; p<0.001) and CD117 expression (<5.9%; OR, 3.7;

216 p=0.001) and high reactivity for CD15 (>77%; OR, 3.4; p<0.001), CD36 (>87%; OR, 3.2; p<0.001),  
217 and CD123 (>83%; OR, 2.9; p<0.001) (Table 1).

218 When we restricted the analysis to cases showing a normal karyotype, similar phenotypic  
219 differences were observed (data not shown).

220

#### 221 **Univariate analysis of *FLT3*-ITD associated immunophenotypes in *NPM1*<sup>mut</sup> and *NPM1*<sup>wt</sup>**

222 **AML.** Univariate analysis revealed that the presence of *FLT3*-ITD on AML-*NPM1*<sup>mut</sup> patients was  
223 associated with the presence of immature AML cells showing positivity for CD34 (OR, 5.3;  
224 p=0.001), CD7 (>55% positive AML cells; OR, 5.4; p<0.001) and CD25 (>25%; OR, 7.1; p=0.02),  
225 together with heterogeneous CD38 expression levels (<95%; OR, 5.6; p<0.001) (Table 1). Among  
226 AML-*NPM1*<sup>mut</sup> patients with neutrophil lineage leukemia cells, *FLT3*-ITD was associated with  
227 heterogeneous CD117 expression (<69% positive AML cells; OR, 5.7; p=0.001) and high levels  
228 of both CD123 (>84%; OR, 4.6; p=0.003) and CD13 expression (>56%; OR, 2.6; p=0.05). In  
229 contrast, no phenotypic features of monocytic-committed AML-*NPM1*<sup>mut</sup> cells were found to be  
230 associated with coexistence of *FLT3*-ITD (Table 1).

231 Among AML-*NPM1*<sup>wt</sup> patients baseline detection of higher BM leukemia cell counts (>40%;  
232 OR, 3.7, p=0.02) with *NPM1*<sup>wt</sup> immature blasts showing lower and heterogeneous CD34  
233 expression (<57%, OR, 4.3; p=0.004) together with higher positivity for CD25 (>10%; OR, 6.9;  
234 p=0.01) was associated with *FLT3*-ITD, in the univariate analysis (Table 1).

235

#### 236 **Supplementary references**

- 237 1 Arber DA, Orazi A, Hasserjian R, Thiele J, Borowitz MJ, Le Beau MM *et al.* The 2016  
238 revision to the World Health Organization classification of myeloid neoplasms and acute  
239 leukemia. *Blood* 2016; **127**: 2391–2405.
- 240 2 Kalina T, Flores-Montero J, Lecomte Q, Pedreira CE, van der Velden VHJ, Novakova M  
241 *et al.* Quality assessment program for EuroFlow protocols: summary results of four-year  
242 (2010-2013) quality assurance rounds. *Cytom Part J Int Soc Anal Cytol* 2015; **87**: 145–156.
- 243 3 Kalina T, Flores-Montero J, van der Velden VHJ, Martin-Ayuso M, Böttcher S, Ritgen M *et*  
244 *al.* EuroFlow standardization of flow cytometer instrument settings and immunophenotyping  
245 protocols. *Leukemia* 2012; **26**: 1986–2010.
- 246 4 van Dongen JJM, Lhermitte L, Böttcher S, Almeida J, van der Velden VHJ, Flores-Montero  
247 J *et al.* EuroFlow antibody panels for standardized n-dimensional flow cytometric  
248 immunophenotyping of normal, reactive and malignant leukocytes. *Leukemia* 2012; **26**:  
249 1908–1975.



- 250 5 Bras AE, Matarraz S, Nierkens S, Fernández P, Philippé J, Aanei C-M *et al.* Quality  
251 Assessment of a Large Multi-Center Flow Cytometric Dataset of Acute Myeloid Leukemia  
252 Patients-A EuroFlow Study. *Cancers* 2022; **14**: 2011.
- 253 6 Lhermitte L, Mejstrikova E, van der Sluijs-Gelling AJ, Grigore GE, Sedek L, Bras AE *et al.*  
254 Automated database-guided expert-supervised orientation for immunophenotypic diagnosis  
255 and classification of acute leukemia. *Leukemia* 2018; **32**: 874–881.
- 256 7 Orfao A, Matarraz S, Pérez-Andrés M, Almeida J, Teodosio C, Berkowska MA *et al.*  
257 Immunophenotypic dissection of normal hematopoiesis. *J Immunol Methods* 2019; **475**:  
258 112684.
- 259 8 Orfao A, Chillón MC, Bortoluci AM, López-Berges MC, García-Sanz R, Gonzalez M *et al.*  
260 The flow cytometric pattern of CD34, CD15 and CD13 expression in acute myeloblastic  
261 leukemia is highly characteristic of the presence of PML-RARalpha gene rearrangements.  
262 *Haematologica* 1999; **84**: 405–412.
- 263 9 Gabert J, Beillard E, van der Velden VHJ, Bi W, Grimwade D, Pallisgaard N *et al.*  
264 Standardization and quality control studies of 'real-time' quantitative reverse transcriptase  
265 polymerase chain reaction of fusion gene transcripts for residual disease detection in  
266 leukemia - a Europe Against Cancer program. *Leukemia* 2003; **17**: 2318–2357.
- 267 10 Thiede C, Koch S, Creutzig E, Steudel C, Illmer T, Schaich M *et al.* Prevalence and  
268 prognostic impact of NPM1 mutations in 1485 adult patients with acute myeloid leukemia  
269 (AML). *Blood* 2006; **107**: 4011–4020.
- 270 11 Thiede C, Steudel C, Mohr B, Schaich M, Schäkel U, Platzbecker U *et al.* Analysis of FLT3-  
271 activating mutations in 979 patients with acute myelogenous leukemia: association with  
272 FAB subtypes and identification of subgroups with poor prognosis. *Blood* 2002; **99**: 4326–  
273 4335.
- 274 12 Benthaus T, Schneider F, Mellert G, Zellmeier E, Schneider S, Kakadia PM *et al.* Rapid and  
275 sensitive screening for CEBPA mutations in acute myeloid leukaemia. *Br J Haematol* 2008;  
276 **143**: 230–239.
- 277 13 Aguilera-Diaz A, Vazquez I, Ariceta B, Mañú A, Blasco-Iturri Z, Palomino-Echeverría S *et*  
278 *al.* Assessment of the clinical utility of four NGS panels in myeloid malignancies.  
279 Suggestions for NGS panel choice or design. *PloS One* 2020; **15**: e0227986.

**Supplementary Table 1.** Euroflow AML/MDS panel: antibody positions per fluorochrome

| Tube | Fluorochrome conjugates |      |                      |        |            |       |        |       |
|------|-------------------------|------|----------------------|--------|------------|-------|--------|-------|
|      | PacB                    | PacO | FITC                 | PE     | PerCPCy5.5 | PECy7 | APC    | APCH7 |
| 1    | HLADR                   | CD45 | CD16                 | CD13   | CD34       | CD117 | CD11b  | CD10  |
| 2    | HLADR                   | CD45 | CD35                 | CD64   | CD34       | CD117 | CD300e | CD14  |
| 3    | HLADR                   | CD45 | CD36                 | CD105  | CD34       | CD117 | CD33   | CD71  |
| 4    | HLADR                   | CD45 | NuTdT                | CD56   | CD34       | CD117 | CD7    | CD19  |
| 5    | HLADR                   | CD45 | CD15                 | NG2    | CD34       | CD117 | CD22   | CD38  |
| 6    | HLADR                   | CD45 | CD42a<br>and<br>CD61 | CD203c | CD34       | CD117 | CD123  | CD4   |
| 7    | HLADR                   | CD45 | CD41                 | CD25   | CD34       | CD117 | CD42b  | CD9   |

AML, acute myeloid leukemia; APC, allophycocyanine; Cy7, cyanine7; FITC, fluorescein isothiocyanate; H7, hilite7; MDS, myelodysplastic syndrome; Nu, nuclear; PacB, pacific blue; PacO, pacific orange; PE, phycoerythrin; PerCPCy5.5, peridinin–chlorophyll–protein–cyanine 5.5.

**Supplementary Table 2. Distribution of different subsets of leukemia cells in BM of AML and APL patients according to the presence vs. absence of *NPM1*<sup>mut</sup> and/or *FLT3-ITD***

| Phenotypic subsets of leukemia cells | AML patient groups                   |                                     |                                         |              |                                      |                                     |                                          |                  |                                     |                                     |                    |             |
|--------------------------------------|--------------------------------------|-------------------------------------|-----------------------------------------|--------------|--------------------------------------|-------------------------------------|------------------------------------------|------------------|-------------------------------------|-------------------------------------|--------------------|-------------|
|                                      | AML- <i>NPM1</i> <sup>wt</sup>       |                                     |                                         | p #          | AML- <i>NPM1</i> <sup>mut</sup>      |                                     |                                          | p #              | APL                                 |                                     |                    | p #         |
|                                      | <i>FLT3-ITD</i> <sup>-</sup> (n=117) | <i>FLT3-ITD</i> <sup>+</sup> (n=27) | Total <i>NPM1</i> <sup>wt</sup> (n=144) |              | <i>FLT3-ITD</i> <sup>-</sup> (n=135) | <i>FLT3-ITD</i> <sup>+</sup> (n=66) | Total <i>NPM1</i> <sup>mut</sup> (n=201) |                  | <i>FLT3-ITD</i> <sup>-</sup> (n=21) | <i>FLT3-ITD</i> <sup>+</sup> (n=11) | Total APL (n=32)   |             |
| % total BM leukemia cells            | 51%<br>(9-97%)**                     | 74%<br>(13-97%)**                   | 55%<br>(9-97%)**                        | <b>0.008</b> | 68%<br>(8-8%)                        | 87%<br>(19-99%)                     | 75%<br>(8-98%)                           | <b>&lt;0.001</b> | 76%<br>(26-98%)                     | 80%<br>(71-87%)                     | 79%<br>(26-98%)    | <b>0.4</b>  |
| Immature leukemia cells              | 63%<br>(0-100%)**                    | 56%<br>(0-100%)**                   | 62%<br>(0-100%)**                       | <b>0.4</b>   | 25%<br>(0-100%)                      | 36%<br>(0-100%)                     | 26%<br>(0-100%)                          | <b>0.05</b>      | .3%<br>(.05-15)*                    | 3%<br>(0-26%)                       | .5%<br>(0-26%)**   | <b>.03</b>  |
| Neutrophil-lineage leukemia cells    | 11%<br>(0-100)**                     | 12%<br>(0-80%)**                    | 11%<br>(0-100)**                        | <b>0.9</b>   | 37%<br>(0-100%)                      | 34%<br>(0-100%)                     | 36%<br>(0-100%)                          | <b>0.8</b>       | 99%<br>(85-100%)**                  | 88%<br>(70-100%)**                  | 99%<br>(70-100%)** | <b>.003</b> |
| Monocytic leukemia cells             | 26%<br>(0-100)*                      | 32%<br>(0-100)                      | 27%<br>(0-100%)                         | <b>0.9</b>   | 38%<br>(0-100%)                      | 30%<br>(0-100%)                     | 35%<br>(0-100%)                          | <b>0.08</b>      | .2%<br>(0-2)**                      | 2%<br>(.05-13)                      | .5%<br>(0-13)**    | <b>.05</b>  |

Results expressed as median percentage (range) of leukemia cells in BM. #, p-values correspond to comparisons between *FLT3-ITD*<sup>-</sup> and *FLT3-ITD*<sup>+</sup> AML patient groups; \*, p<0.05; \*\*, p<0.03 vs. *NPM1*<sup>mut</sup> cases. AML, acute myeloid leukemia; APL, acute promyelocytic leukemia; BM, bone marrow; ns, no statistically significant differences detected.

**Supplementary Table 3. Immunophenotypic patterns of leukemia cell subsets in AML patients**

| Leukemic cell phenotype                     | CD34+ and/or CD117+HLADR+ AML cells (n=212) |                                   |                  | AML cells with Neutrophil maturation (n=150) |                                   |                   |                  | AML cells with monocytic maturation (n=165) |                                    |                  |
|---------------------------------------------|---------------------------------------------|-----------------------------------|------------------|----------------------------------------------|-----------------------------------|-------------------|------------------|---------------------------------------------|------------------------------------|------------------|
|                                             | <i>NPM1</i> <sup>wt</sup> (n=120)           | <i>NPM1</i> <sup>mut</sup> (n=92) | <i>p-value</i> * | <i>NPM1</i> <sup>wt</sup> (n=28)             | <i>NPM1</i> <sup>mut</sup> (n=90) | <i>APL</i> (n=32) | <i>p-value</i> * | <i>NPM1</i> <sup>wt</sup> (n=58)            | <i>NPM1</i> <sup>mut</sup> (n=107) | <i>p-value</i> * |
| <b>Hematopoietic precursor cell markers</b> |                                             |                                   |                  |                                              |                                   |                   |                  |                                             |                                    |                  |
| CD34                                        | 105 (88%)                                   | 23 (25%)                          | <b>&lt;0.001</b> | 12 (43%)                                     | 5 (6%)                            | 15 (47%)          | <b>&lt;0.001</b> | 20 (35%)                                    | 1 (1%)                             | <b>&lt;0.001</b> |
| CD33                                        | 113 (94%)                                   | 92 (100%)                         | <b>0.02</b>      | 26 (93%)                                     | 87 (97%)                          | 31 (97%)          | <i>ns</i>        | 58 (100%)                                   | 107 (100%)                         | <i>ns</i>        |
| CD38                                        | 117 (98%)                                   | 92 (100%)                         | <i>ns</i>        | 24 (86%)                                     | 89 (99%)                          | 27 (84%)          | <b>0.004</b>     | 57 (98%)                                    | 107 (100%)                         | <i>ns</i>        |
| CD71                                        | 120 (100%)                                  | 92 (100%)                         | <i>ns</i>        | 25 (89%)                                     | 80 (89%)                          | 27 (84%)          | <i>ns</i>        | 40 (69%)                                    | 72 (67%)                           | <i>ns</i>        |
| CD105                                       | 32 (27%)                                    | 5 (5%)                            | <b>&lt;0.001</b> | 5 (18%)                                      | 26 (29%)                          | 0%                | <b>0.002</b>     | 36 (62%)                                    | 71 (66%)                           | <i>ns</i>        |
| CD117                                       | 120 (100%)                                  | 92 (100%)                         | <i>ns</i>        | 26 (93%)                                     | 89 (99%)                          | 31 (97%)          | <i>ns</i>        | 18 (31%)                                    | 10 (9%)                            | <b>&lt;0.001</b> |
| CD123                                       | 119 (99%)                                   | 91 (99%)                          | <i>ns</i>        | 22 (79%)                                     | 83 (92%)                          | 29 (91%)          | <i>ns</i>        | 58 (100%)                                   | 107 (100%)                         | <i>ns</i>        |
| HLADR                                       | 120 (100%)                                  | 92 (100%)                         | <i>ns</i>        | 0%                                           | 0%                                | 0%                | <i>ns</i>        | 55 (95%)                                    | 105 (98%)                          | <i>ns</i>        |
| <b>Myeloid associated markers</b>           |                                             |                                   |                  |                                              |                                   |                   |                  |                                             |                                    |                  |
| CyMPO                                       | 78 (65%)                                    | 76 (83%)                          | <b>.01</b>       | 27 (96%)                                     | 70 (78%)                          | 31 (97%)          | <b>0.01</b>      | 47 (82%)                                    | 70 (66%)                           | <b>0.03</b>      |
| CD11b                                       | 0%                                          | 0%                                | <i>ns</i>        | 4 (14%)                                      | 4 (4%)                            | 2 (6%)            | <i>ns</i>        | 52 (90%)                                    | 97 (91%)                           | <i>ns</i>        |
| CD13                                        | 119 (99%)                                   | 88 (96%)                          | <i>ns</i>        | 26 (93%)                                     | 77 (86%)                          | 31 (97%)          | <i>ns</i>        | 52 (90%)                                    | 68 (64%)                           | <b>&lt;0.001</b> |
| CD15                                        | 46 (38%)                                    | 52 (56%)                          | <b>0.008</b>     | 15 (54%)                                     | 29 (32%)                          | 15 (47%)          | <i>ns</i>        | 57 (98%)                                    | 107 (100%)                         | <i>ns</i>        |
| CD16                                        | 0%                                          | 0%                                | <i>ns</i>        | 0%                                           | 0%                                | 0%                | <i>ns</i>        | 1 (2%)                                      | 11 (10%)                           | <b>.05</b>       |
| CD14                                        | 0%                                          | 0%                                | <i>ns</i>        | 0%                                           | 0%                                | 0%                | <i>ns</i>        | 46 (79%)                                    | 69 (64%)                           | <b>0.04</b>      |
| CD35                                        | 0%                                          | 0%                                | <i>ns</i>        | 2 (7%)                                       | 2 (2%)                            | 1 (3%)            | <i>ns</i>        | 45 (78%)                                    | 89 (83%)                           | <i>ns</i>        |
| CD36                                        | 13 (11%)                                    | 4 (4%)                            | <i>ns</i>        | 3 (11%)                                      | 0%                                | 0%                | <b>.001</b>      | 53 (91%)                                    | 105 (98%)                          | <b>0.05</b>      |
| CD64                                        | 49 (41%)                                    | 25 (27%)                          | <b>.03</b>       | 15 (54%)                                     | 34 (38%)                          | 30 (94%)          | <b>&lt;0.001</b> | 58 (100%)                                   | 107 (100%)                         | <i>ns</i>        |
| CD300e                                      | 0%                                          | 0%                                | <i>ns</i>        | 0%                                           | 0%                                | 0%                | <i>ns</i>        | 34 (59%)                                    | 89 (83%)                           | <b>0.001</b>     |
| <b>Lymphoid and aberrant markers</b>        |                                             |                                   |                  |                                              |                                   |                   |                  |                                             |                                    |                  |
| CD4                                         | 50 (42%)                                    | 38 (41%)                          | <i>ns</i>        | 5 (18%)                                      | 22 (24%)                          | 7 (22%)           | <i>ns</i>        | 51 (88%)                                    | 102 (95%)                          | <i>ns</i>        |
| CD7                                         | 38 (32%)                                    | 55 (60%)                          | <b>&lt;0.001</b> | 6 (21%)                                      | 5 (6%)                            | 6 (19%)           | <b>.02</b>       | 1 (2%)                                      | 2 (2%)                             | <i>ns</i>        |
| CD19                                        | 11 (9%)                                     | 7 (8%)                            | <i>ns</i>        | 0%                                           | 1 (1%)                            | 0%                | <i>ns</i>        | 0%                                          | 0%                                 | <i>ns</i>        |
| CD22                                        | 14 (12%)                                    | 9 (10%)                           | <i>ns</i>        | 1 (4%)                                       | 3 (3%)                            | 0%                | <i>ns</i>        | 1 (2%)                                      | 2 (2%)                             | <i>ns</i>        |
| CD203c                                      | 0%                                          | 0%                                | <i>ns</i>        | 0%                                           | 0%                                | 7 (22%)           | <b>&lt;0.001</b> | 0%                                          | 0%                                 | <i>ns</i>        |
| CD56                                        | 18 (15%)                                    | 1 (1%)                            | <b>&lt;0.001</b> | 2 (7%)                                       | 22 (24%)                          | 3 (9%)            | <b>0.04</b>      | 17 (29%)                                    | 49 (46%)                           | <b>0.03</b>      |
| nuTdT                                       | 24 (20%)                                    | 3 (3%)                            | <b>&lt;0.001</b> | 1 (4%)                                       | 6 (7%)                            | 0%                | <i>ns</i>        | 1 (2%)                                      | 1 (1%)                             | <i>ns</i>        |
| NG2                                         | 0%                                          | 0%                                | <i>ns</i>        | 0%                                           | 0%                                | 0%                | <i>ns</i>        | 5 (9%)                                      | 2 (2%)                             | <b>.05</b>       |
| <b>Other evaluated markers</b>              |                                             |                                   |                  |                                              |                                   |                   |                  |                                             |                                    |                  |
| CD25                                        | 33/105 (32%)                                | 12/33 (36%)                       | <i>ns</i>        | 1/24 (4%)                                    | 1/39 (3%)                         | 0/7 (0%)          | <i>ns</i>        | 3/58 (5%)                                   | 1/44 (2%)                          | <i>ns</i>        |
| CD9                                         | 59/105 (56%)                                | 18/33 (54%)                       | <i>ns</i>        | 5/24 (21%)                                   | 9/39 (23%)                        | 4/7 (57%)         | <i>ns</i>        | 32/58 (55%)                                 | 28/44 (64%)                        | <i>ns</i>        |

Results expressed as number of AML cases (percentage between brackets). \*, for comparisons among groups. AML, acute myeloid leukemia; ns, no statistically significant differences detected.

Supplementary Table 4. Frequency of asynchronous immunophenotypic maturation profiles detected among monocytic leukemia cells in BM of AML patients.

|                                        | <b>AML-<i>NPM1</i><sup>wt</sup></b>            |                                               |                                                   | <b>AML-<i>NPM1</i><sup>mut</sup></b>           |                                               |                                                    | <b>*<i>p</i>-value</b> |
|----------------------------------------|------------------------------------------------|-----------------------------------------------|---------------------------------------------------|------------------------------------------------|-----------------------------------------------|----------------------------------------------------|------------------------|
|                                        | <b><i>FLT3-ITD</i><sup>-</sup><br/>(n=117)</b> | <b><i>FLT3-ITD</i><sup>+</sup><br/>(n=27)</b> | <b>Total <i>NPM1</i><sup>wt</sup><br/>(n=144)</b> | <b><i>FLT3-ITD</i><sup>-</sup><br/>(n=135)</b> | <b><i>FLT3-ITD</i><sup>+</sup><br/>(n=66)</b> | <b>Total <i>NPM1</i><sup>mut</sup><br/>(n=201)</b> |                        |
| <b>Asynchronous monocytic patterns</b> | 29 (25%)                                       | 6 (22%)                                       | 35 (24%)                                          | 120 (89%)                                      | 60 (91%)                                      | 180 (90%)                                          | <0.001                 |
| Asynchronous (early) CD300e expression | 4 (3%)                                         | 0 (0%)                                        | 4 (3%)                                            | 97 (72%)                                       | 52 (79%)                                      | 149 (74%)                                          | <0.001                 |
| Asynchronous (early) CD35 expression   | 9 (8%)                                         | 4 (15%)                                       | 13 (9%)                                           | 97 (72%)                                       | 47 (71%)                                      | 144 (72%)                                          | <0.001                 |
| Asynchronous (early) CD14 expression   | 17 (15%)                                       | 2 (3%)                                        | 19 (13%)                                          | 10 (7%)                                        | 2 (3%)                                        | 12 (6%)                                            | 0.02                   |

Results expressed as number of AML cases and percentage between brackets; p-values correspond to comparisons between \* total AML-*NPM1*<sup>mut</sup> vs. AML-*NPM1*<sup>wt</sup> patient groups. No statistically significant differences were observed among *FLT3-ITD*<sup>+</sup> vs. *FLT3-ITD*<sup>-</sup> patient groups. APL patients systematically lacked asynchronous monocytic maturation patterns.

**CD117: PE-Cy7-A**

**HLA-DR: PB-A**

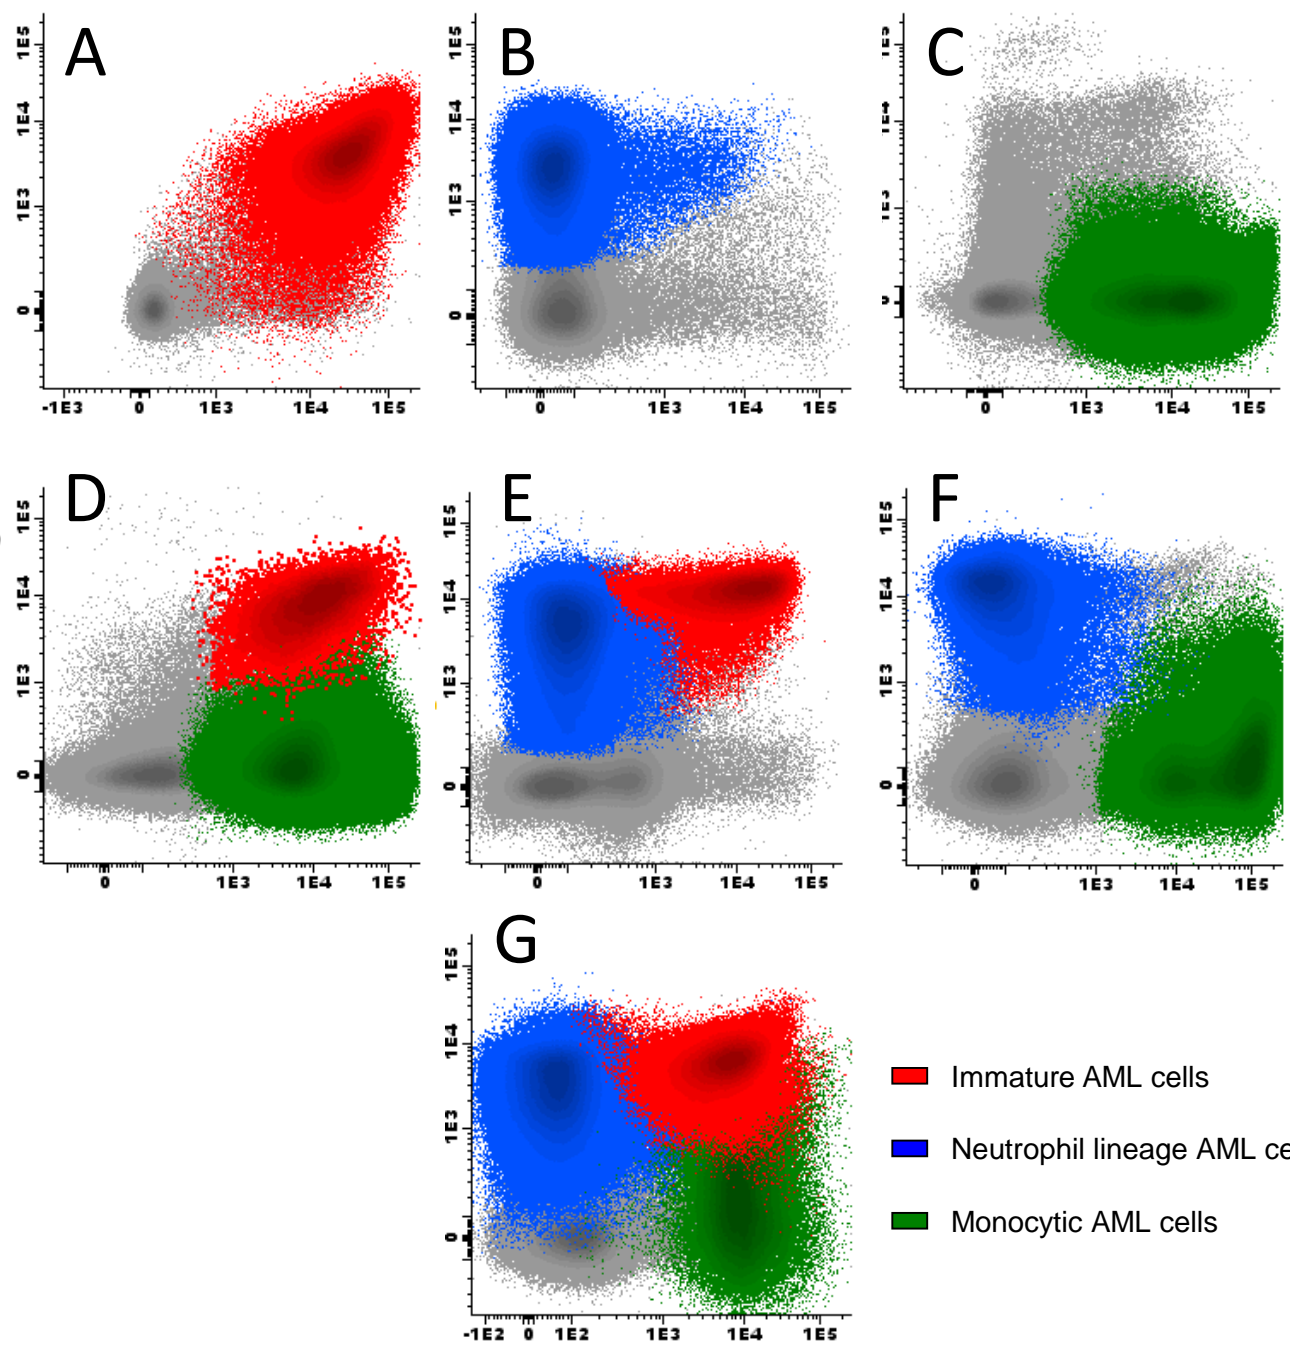

- Immature AML cells
- Neutrophil lineage AML cells
- Monocytic AML cells

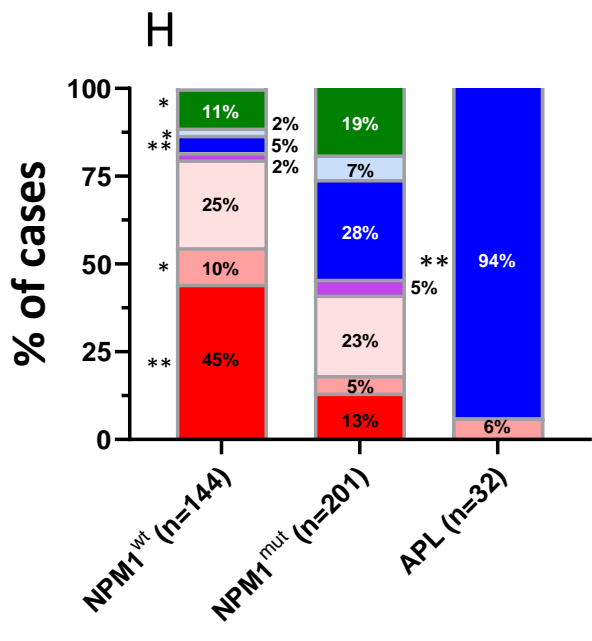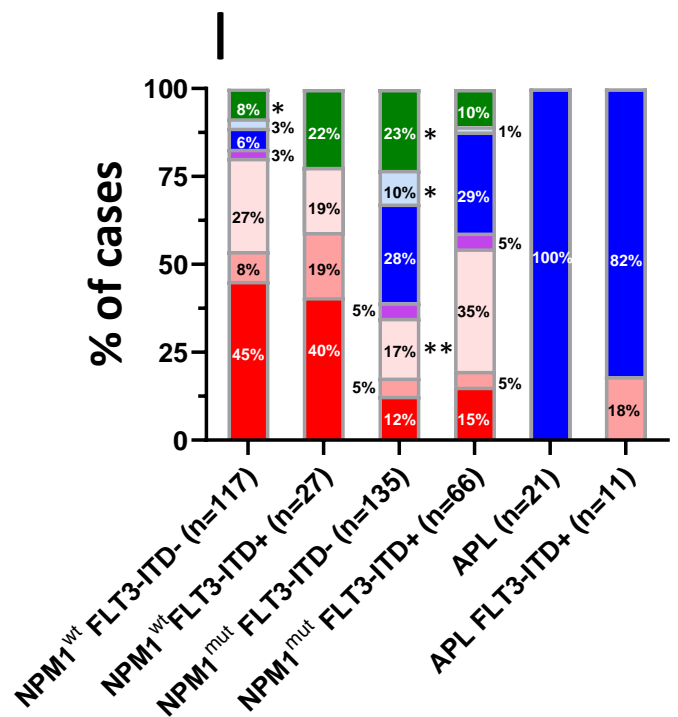

**Predominant AML cell expansions**

- Immature AML cells
- Neutrophil lineage AML cells
- Monocytic AML cells

**Mixed AML cell expansions**

- Neutrophil plus monocytic
- Immature plus neutrophil and monocytic
- Immature plus monocytic blasts
- Immature plus neutrophil blasts

**Supplementary Figure 1.** Relative distribution of BM leukemia cell subset profiles in AML and APL patients grouped according to the presence vs. absence of *NPM1* and/or *FLT3*-ITD mutations. Major expansions of a single predominant leukemia cell population ( $\geq 80\%$  of all leukemia cells) are illustrated in Panels A-C for CD117<sup>+</sup>HLADR<sup>+</sup> immature AML cells, CD117<sup>+/het</sup> HLA-DR<sup>-</sup> neutrophil lineage-, and CD64<sup>+/hi</sup> HLA-DR<sup>+</sup> monocytic lineage-committed leukemia cells (depicted in red, blue and green colors, respectively). Mixed expansions of  $\geq 2$  AML cell populations are depicted in Panels D-G. In panels H and I, stacked bars represent the frequency of cases showing one predominant (major) vs. mixed leukemia cell expansions of: i) immature plus neutrophil (dark pink), ii) immature plus monocytic (light pink), iii) neutrophil plus monocytic (light blue) and, iv) immature plus neutrophil and monocytic lineage committed leukemia cells (purple). \*,  $p < 0.05$  and; \*\*,  $p < 0.03$  vs. *NPM1*<sup>mut</sup> AML patients (Panel H) and vs. *FLT3*-ITD<sup>-</sup> cases (Panel I), respectively.

■ Immature AML cells ■ Neutrophil lineage AML cells ■ Monocytic AML cells

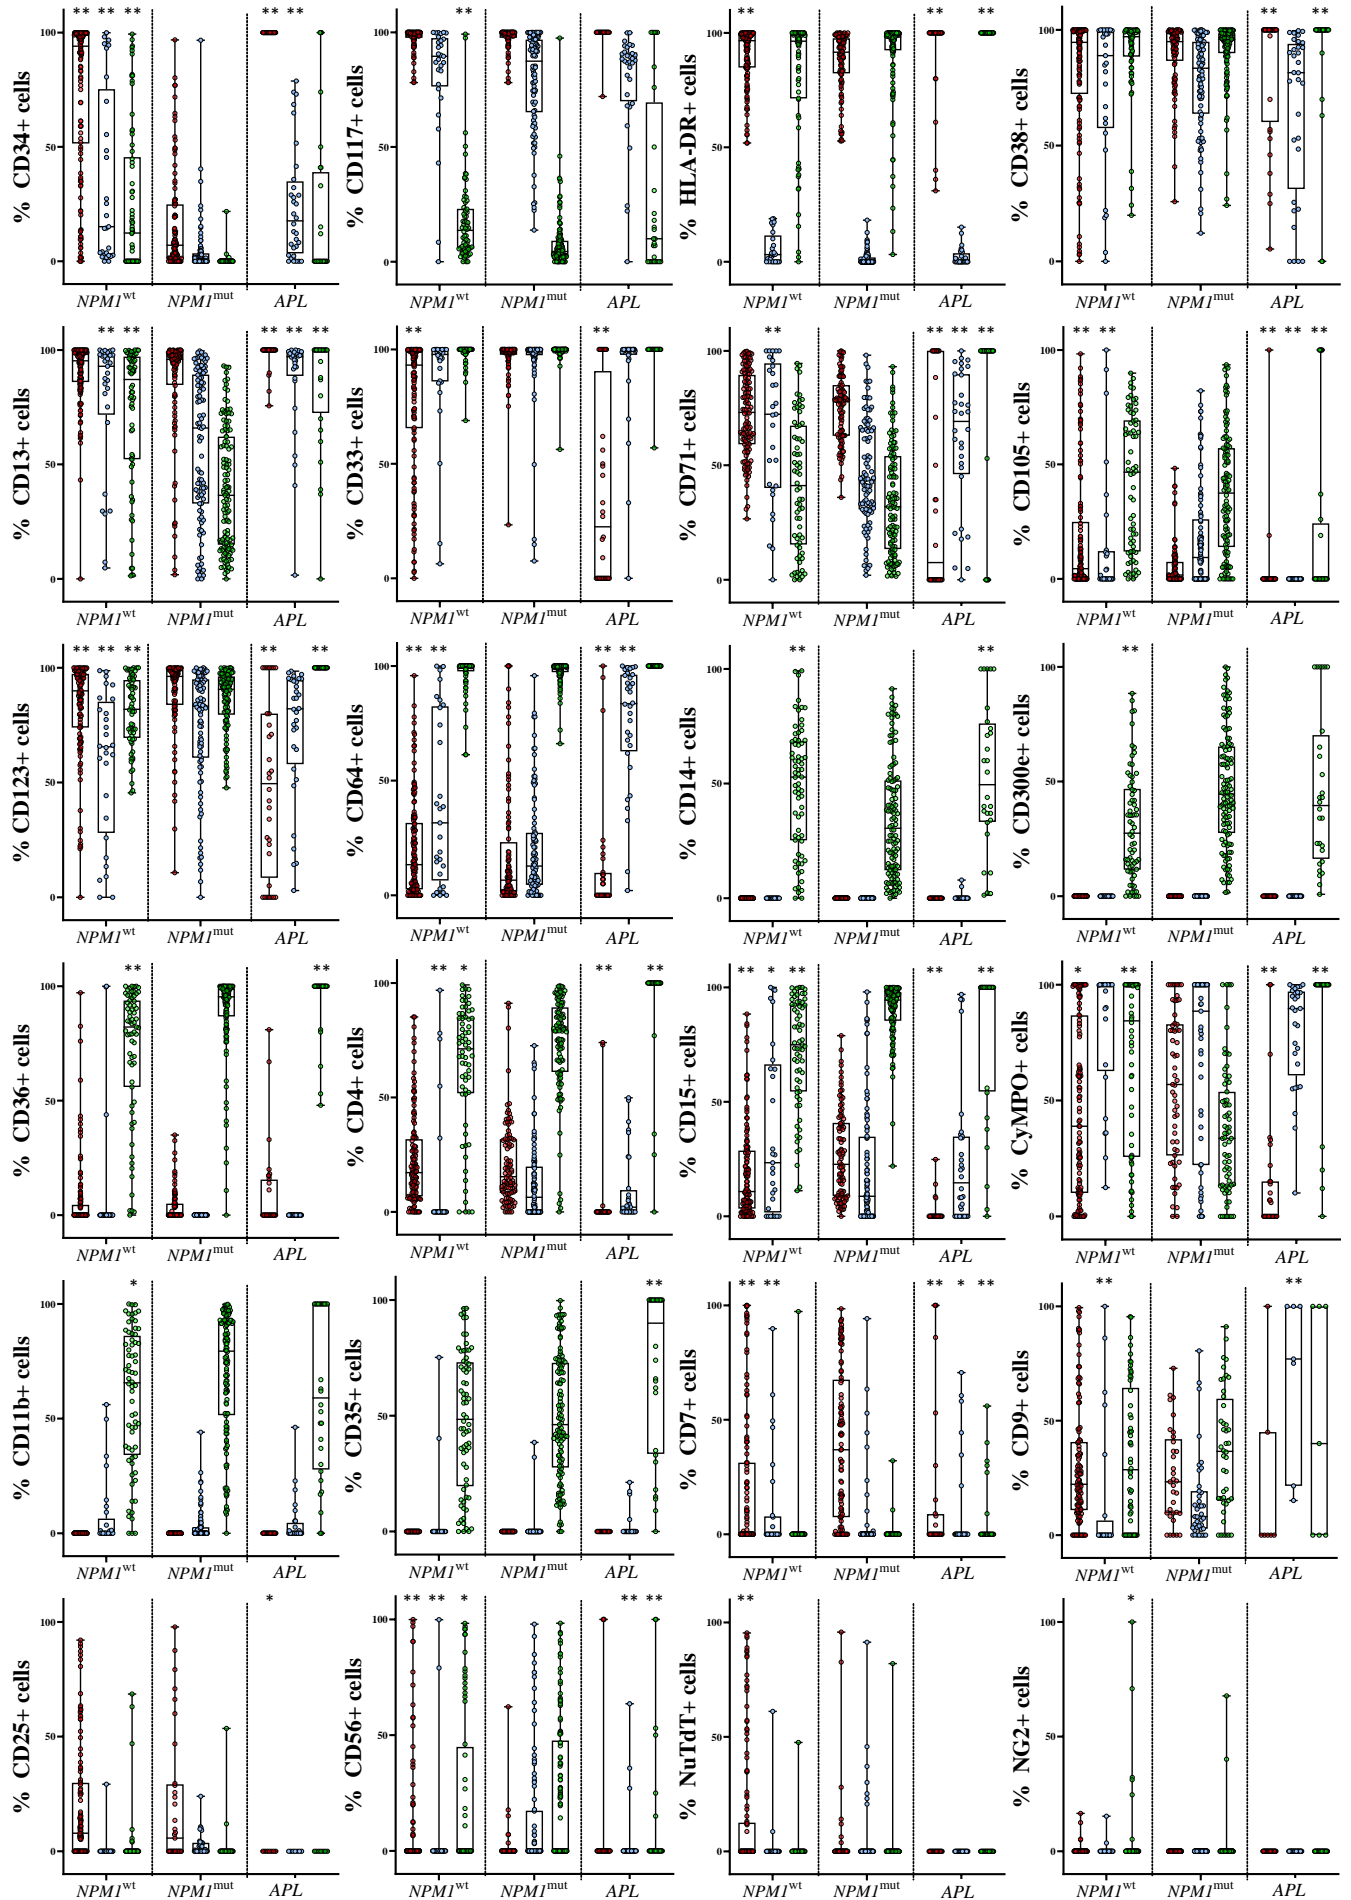

**Supplementary Figure 2.** Immunophenotypic patterns of distinct subsets of immature CD117<sup>+</sup>HLADR<sup>+</sup> (red dots), CD117<sup>+/het</sup> HLA-DR<sup>-</sup> neutrophil lineage- (blue dots) and CD64<sup>+/hi</sup> HLA-DR<sup>+</sup> monocytic lineage-committed (green dots) BM leukemia cells from patients with AML-*NPM1*<sup>mut</sup> vs. AML-*NPM1*<sup>wt</sup> and APL with *PML::RARA* gene rearrangement studied at diagnosis. Results are expressed as percentage of positive cells for individual antigens included in the EuroFlow AML/MDS panel for which statistically significant differences were found among the three patient groups. Notched boxes extend from the 25th to the 75th percentile values; the lines in the middle and vertical lines correspond to median values and minimum and maximum values, respectively. \*, *p* < 0.05 and; \*\*, *p* < 0.03 vs. *NPM1*<sup>mut</sup> AML patients, respectively.



## AML-*NPM1*<sup>mut</sup>

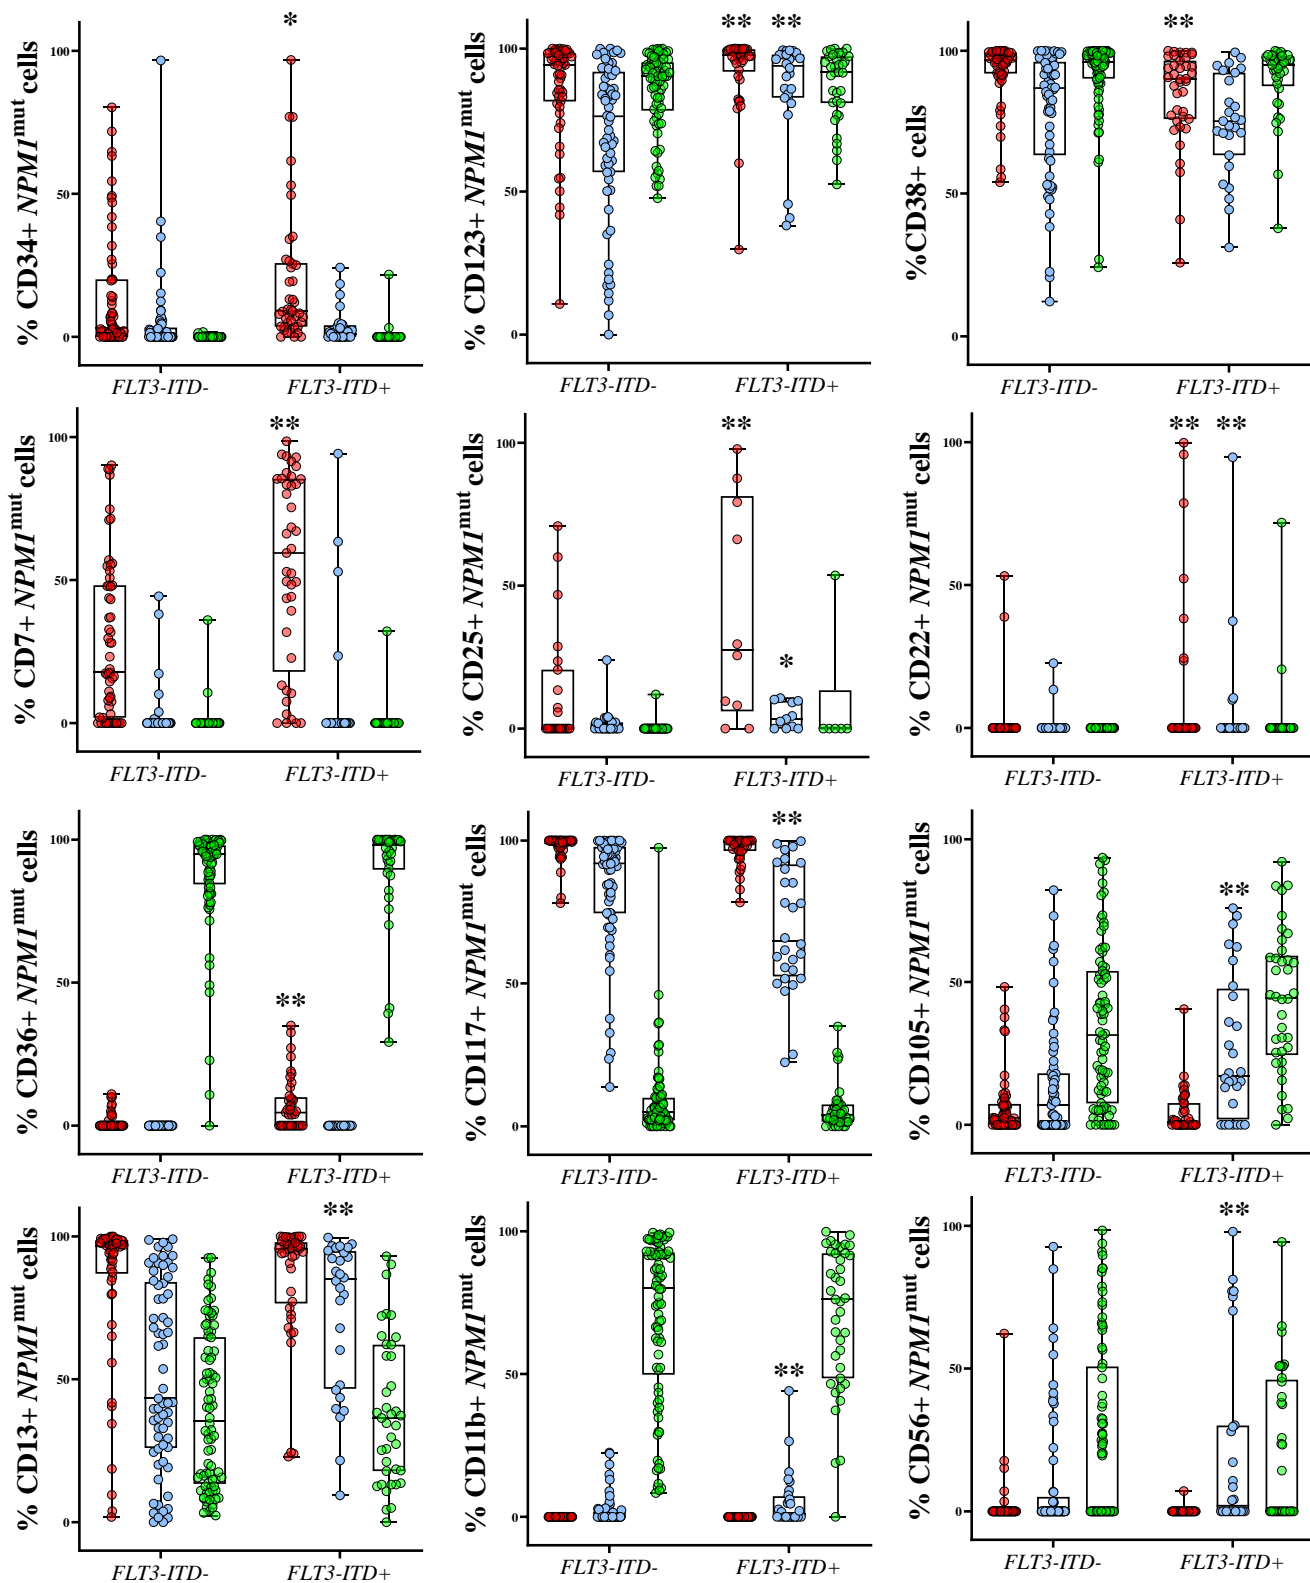

## AML-*NPM1*<sup>wt</sup>

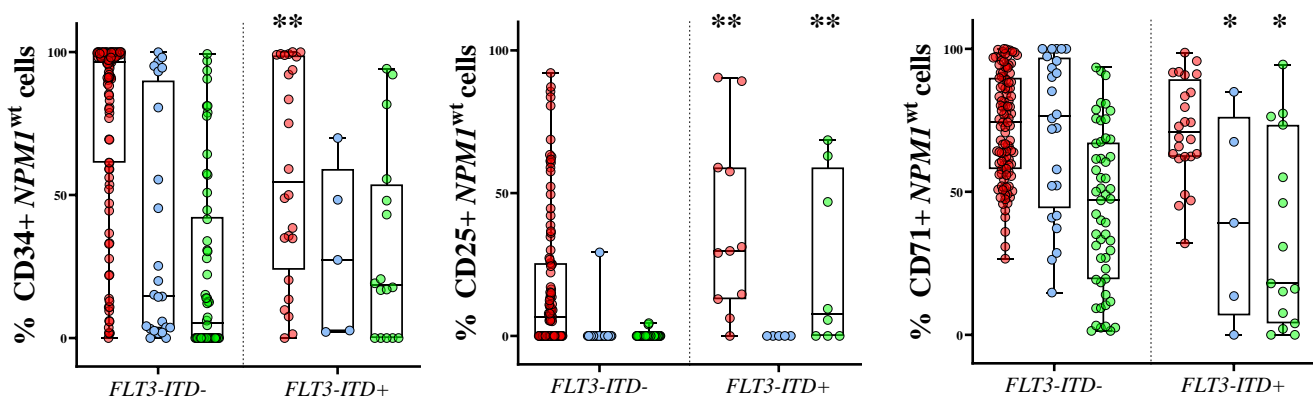

**Supplementary Figure 3.** Immunophenotypic patterns associated with *FLT3*-ITD among immature CD117<sup>+</sup>HLADR<sup>+</sup> AML cells (red dots), CD117<sup>+/het</sup>HLA-DR<sup>-</sup> neutrophil lineage- (blue dots) and CD64<sup>+/hi</sup>HLA-DR<sup>+</sup> monocytic lineage-committed (green dots) BM leukemia cells from AML patients with *NPM1*<sup>mut</sup> (upper panels) and *NPM1*<sup>wt</sup> (lower panels) at diagnosis. Results are expressed as percentage of positive cells for individual antigens from the EuroFlow AML/MDS panel showing statistical differences among patient groups. Notched boxes extend from the 25th to the 75th percentile values; the lines in the middle and vertical lines correspond to median values and minimum and maximum values, respectively. \*,  $p < 0.05$ ; \*\*,  $p < 0.03$  for comparisons vs. *FLT3*-ITD<sup>-</sup> AML patients, respectively.
